# Supplementary material for: Postnatal Enrichment Corrects Deficits in Perineuronal Net Formation and Reversal Learning in Adult Mice Exposed to Early Adversity
Source: PubMed Central journal article supplement — bioRxiv. 2024 Sep 23:2024.09.21.614236. Preprint. [Version 1] doi: 10.1101/2024.09.21.614236 (PMC11463485; doi:10.1101/2024.09.21.614236), 2024-09-23
Supplement: NIHPP2024.09.21.614236v1-supplement-1.pdf [file NIHPP2024.09.21.614236v1-supplement-1.pdf]

## Supplemental Information (Figures S1-5).

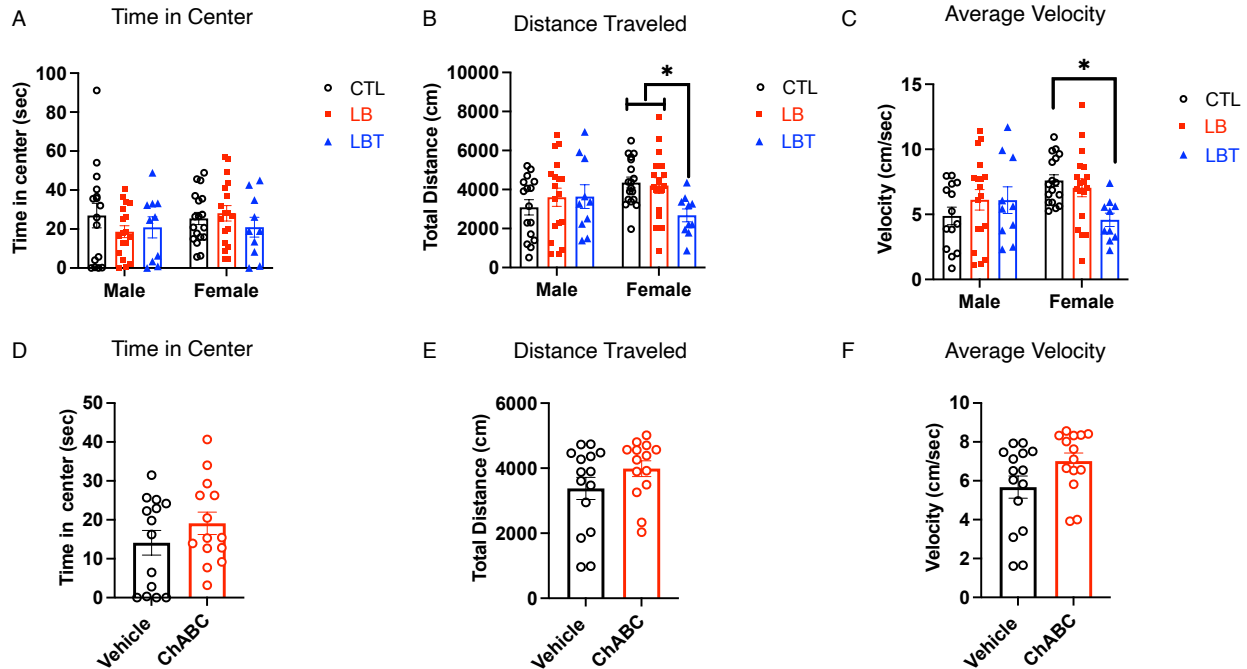

**Fig S1. Exploratory Behavior in the Open Field.** Effects of rearing conditions (A-C) and PNN degradation in the OFC (D-E). **A.** Time in the center, rearing:  $F(2, 84) = 0.61$ ,  $P = 0.54$ , sex:  $F(1, 84) = 0.50$ ,  $P = 0.48$ , interaction:  $F(2, 84) = 0.98$ ,  $P = 0.38$ . **B.** Distance traveled, rearing:  $F(2, 84) = 1.39$ ,  $P = 0.25$ , sex:  $F(1, 84) = 0.73$ ,  $P = 0.39$ , interaction:  $F(2, 84) = 3.00$ ,  $P = 0.054$ . Post-hoc analysis males: CTL vs. LB:  $P = 0.62$ , CTL vs. LBT:  $P = 0.67$ , LB vs. LBT:  $P = 0.99$ . Post-hoc analysis females: CTL vs. LB:  $P = 0.96$ , CTL vs. LBT:  $P = 0.027$ , LB vs. LBT:  $P = 0.049$ . **C.** Velocity, rearing:  $F(2, 81) = 1.38$ ,  $P = 0.26$ , sex:  $F(1, 81) = 1.42$ ,  $P = 0.23$ , interaction:  $F(2, 81) = 3.75$ ,  $P = 0.028$ . Post-hoc analysis males: CTL vs. LB:  $P = 0.41$ , CTL vs. LBT:  $P = 0.52$ , LB vs. LBT:  $P = 0.99$ . Post-hoc analysis females: CTL vs. LB:  $P = 0.81$ , CTL vs. LBT:  $P = 0.017$ , LB vs. LBT:  $P = 0.059$ . **D.** Time in center,  $t(26) = 1.17$ ,  $P = 0.25$ . **E.** Distance traveled,  $t(27) = 1.43$ ,  $P = 0.16$ . **F.** Velocity,  $t(27) = 1.88$ ,  $P = 0.07$ . A-C, two-way ANOVA, CTL males  $n = 18$ , CTL females  $n = 18$ , LB males  $n = 18$ , LB females  $n = 18$ , LBT males  $n = 10$ , LBT females  $n = 10$ . From 7-9 different litters per group. D-F, student-t-tests, Vehicle  $n = 15$ , ChABC  $n = 14$ , all males.

31  
32  
33  
34  
35  
36  
37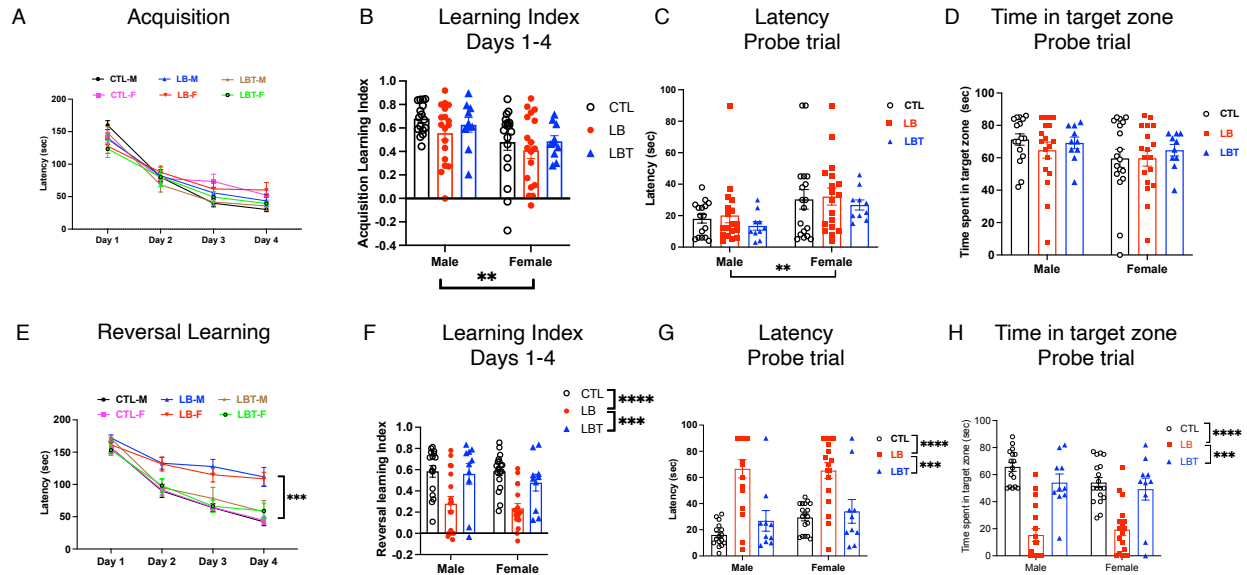38  
39

**Fig S2. Effects of Rearing and Sex on Acquisition Phase (A-D) and Reversal Learning (E-H).** This is the same data shown in Figure 1 except that outcomes in males and females are shown separately. **A.** Acquisition (latency) days 1-4. rmANOVA, days:  $F(2.4, 204.4) = 214, P < 0.001$ , rearing:  $F(2,84) = 0.45, P = 0.81$ , sex:  $F(1,84) = 0.52, P = 0.47$ , interaction:  $F(2,84) = 0.17, P = 0.84$ . **B.** Acquisition (Learning Index) days 1-4. ANOVA, rearing  $F(2, 84) = 1.50, P = 0.23$ , sex  $F(1, 84) = 9.55, P = 0.0027$ , interaction:  $F(2, 84) = 0.14, P = 0.86$ . **C.** Acquisition (probe trial) latency to escape. ANOVA, rearing  $F(2, 84) = 0.62, P = 0.53$ , sex:  $F(1, 84) = 8.92, P = 0.0037$ , interaction:  $F(2, 84) = 0.008, P = 0.99$ . **D.** Acquisition (probe trial) time in target zone. ANOVA, rearing  $F(2, 84) = 0.46, P = 0.62$ , sex:  $F(1, 84) = 2.91, P = 0.092$ , interaction:  $F(2, 84) = 0.34, P = 0.71$ . **E.** Reversal learning (latency) days 1-4. rmANOVA, days:  $F(2.35, 195.17) = 164.21, P < 0.001$ , rearing:  $F(2,83) = 20.62, P < 0.001$ , sex:  $F(1,83) = 0.27, P = 0.60$ , interaction:  $F(2,83) = 0.12, P = 0.88$ . Post-hoc. CTL vs. LB:  $P < 0.001$ , LBT vs. LB:  $P < 0.001$ , CTL vs. LBT:  $P = 0.58$ . **F.** Reversal learning (Learning Index) days 1-4. ANOVA, rearing  $F(2, 84) = 18.40, P < 0.0001$ , sex:  $F(1, 84) = 0.67, P = 0.41$ , interaction:  $F(2, 84) = 0.21, P = 0.81$ . Post-hoc. CTL vs. LB:  $P < 0.0001$ , LBT vs. LB:  $P = 0.0004$ , CTL vs. LBT:  $P = 0.69$ . **G.** Reversal learning (probe trial) latency to escape. ANOVA, rearing  $F(2, 84) = 35.86, P < 0.0001$ , sex:  $F(1, 84) = 1.75, P = 0.18$ , interaction:  $F(2, 84) = 0.95, P = 0.39$ . Post-hoc. CTL vs. LB:  $P < 0.0001$ , LBT vs. LB:  $P < 0.0001$ , CTL vs. LBT:  $P = 0.44$ . **H.** Reversal learning (probe trial) time in target zone. Rearing  $F(2, 84) = 50.20, P < 0.0001$ , sex:  $F(1, 84) = 1.047, P = 0.30$ , interaction  $F(2, 84) = 1.536, P = 0.22$ . Post-hoc Sidak. CTL-LB  $P < 0.0001$ , LBT-LB  $P < 0.0001$ , CTL-LBT  $P = 0.2607$ . **N.** Schematic illustration of maze during reversal learning. CTL males  $n = 18$ , CTL females  $n = 18$ , LB males  $n = 18$ , LB females  $n = 18$ , LBT males  $n = 10$ , LBT females  $n = 10$ . From 7-9 different litters per group.

62  
63  
64

65  
66  
67  
68  
69  
70  
71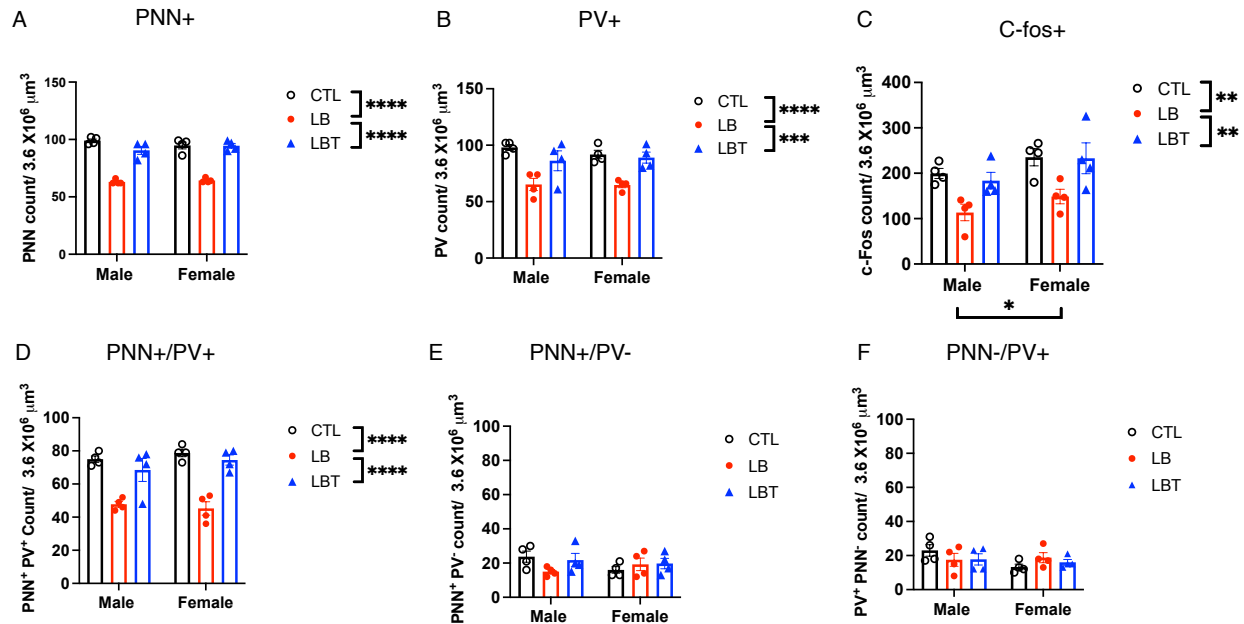

72

73 **Fig S3. Effects of Rearing and Sex on PNN Formation in the OFC.** This is the same data  
 74 shown in Figure 2 except that outcomes in males and females are shown separately here.  
 75 Postnatal Enrichment Mitigates Deficits in PNN Formation and Neuronal activation in the OFC of  
 76 LB Mice **A.** PNN+ cell density. ANOVA, rearing:  $F(2,18) = 135.3, P < 0.0001$ , sex:  $F(1,18) =$   
 77  $0.034, P = 0.85$ , interaction:  $F(2,18) = 1.83, P = 0.19$ . Post-hoc, CTL vs. LB:  $P < 0.0001$ , LBT vs.  
 78 LB:  $P < 0.0001$ , CTL vs. LBT:  $P = 0.17$ . **B.** PV+ cell density. ANOVA, rearing:  $F(2,18) = 18.55, P <$   
 79  $0.0001$ , sex:  $F(1,18) = 0.10, P = 0.75$ , interaction:  $F(2,18) = 0.39, P = 0.67$ . Post-hoc, CTL vs. LB:  
 80  $P < 0.0001$ , LBT vs. LB:  $P = 0.0009$ , CTL vs. LBT:  $P = 0.35$ . **C.** c-fos+ cell density. ANOVA, rearing:  
 81  $F(2,18) = 10.54, P = 0.0009$ , sex:  $F(1,18) = 5.65, P = 0.029$ , interaction:  $F(2,18) = 0.074, P = 0.93$ .  
 82 Post-hoc, CTL vs. LB:  $P = 0.0017$ , LBT vs. LB:  $P = 0.0045$ , CTL vs. LBT:  $P = 0.96$ . **D.** PNN+PV+  
 83 cell density. ANOVA, rearing:  $F(2,18) = 36.65, P < 0.0001$ , sex:  $F(1,18) = 0.61, P = 0.44$ ,  
 84 interaction:  $F(2,18) = 0.67, P = 0.52$ . Post-hoc, CTL vs. LB:  $P < 0.0001$ , LBT vs. LB:  $P < 0.0001$ ,  
 85 CTL vs. LBT:  $P = 0.35$ . **E.** PNN+PV- cell density. ANOVA, rearing:  $F(2,18) = 0.79, P = 0.46$ , sex:  
 86  $F(1,18) = 0.56, P = 0.46$ , interaction:  $F(2,18) = 2.01, P = 0.16$ . **F.** PNN-PV+ cell density. ANOVA,  
 87 rearing:  $F(2,18) = 0.12, P = 0.88$ , sex:  $F(1,18) = 2.05, P = 0.17$ , interaction:  $F(2,18) = 1.89, P =$   
 88  $0.18$ . N=4 per rearing and sex group.

89

90

91

92

93

94

95

96  
97  
98  
99  
100  
101  
102  
103  
104  
105  
106  
107  
108  
109

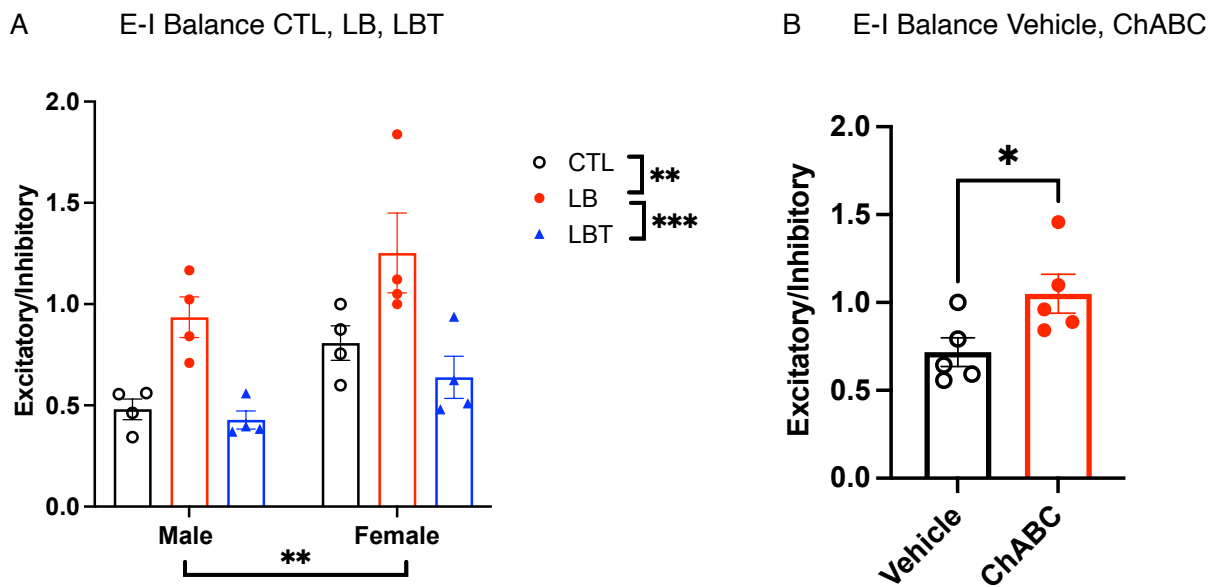

110  
111  
112  
113  
114  
115  
116  
117  
118  
119  
120  
121  
122  
123  
124  
125  
126  
127  
128  
129

**Fig S4. Effects of Rearing and PNN Degradation on the Ratio Between Excitatory and Inhibitory Synapses in the OFC.** **A.** Postnatal enrichment normalizes E-I balance in the OFC, rearing:  $F(2, 18) = 14.78, P=0.0002$ , sex:  $F(1, 18) = 10.21, P=0.0050$ , interaction:  $F(2, 18) = 0.17, P= 0.84$ . Post-hoc Tukey's-HSD: CTL vs. LB:  $P= 0.0018$ , LBT vs. LB:  $P= 0.0002$ , CTL vs. LBT:  $P= 0.58$ . **B.** PNN degradation in the OFC increases E-I balance to levels observed in LB mice,  $t(8)= 2.42, P= 0.042$ .

130  
131  
132  
133  
134  
135

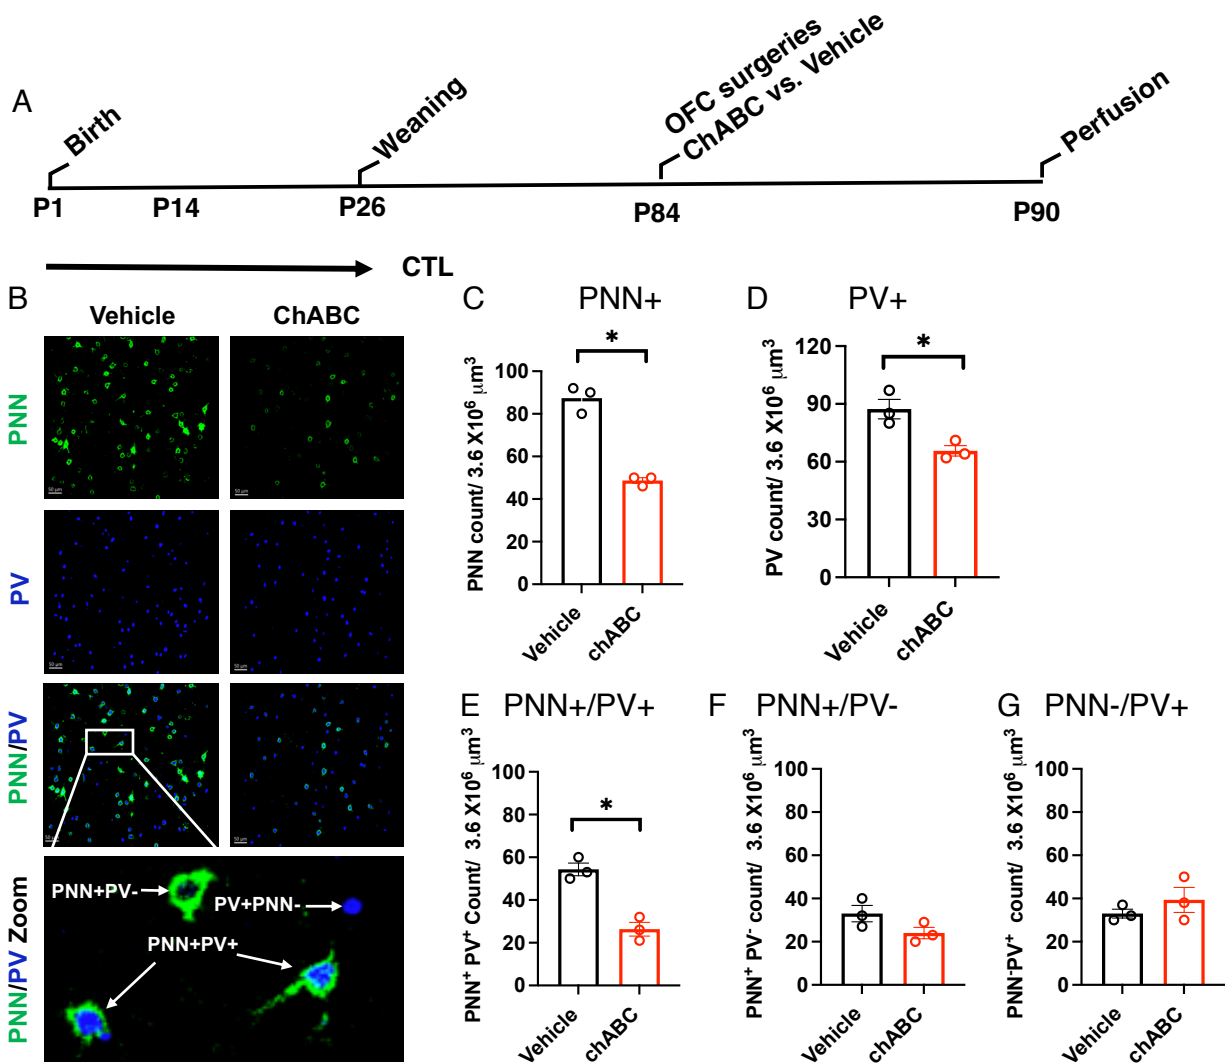

136  
137  
138  
139  
140  
141  
142  
143  
144  
145  
146  
147

**Fig S5. ChABC Treatment Reduces PNN+PV+ Cell Density in the OFC.** **A.** Three adult Balb/cByJ were administered ChABC into the right hemisphere and vehicle into the left hemisphere. Mice were sacrificed 7-days later to quantify levels of PNN+, PV+, PNN+PV+, PNN+PV-, and PNN-PV+ cells in the OFC (**B-G**). ChABC reduced the densities of PNN+ cells (**C**,  $t(2) = 8.29$ ,  $P = 0.014$ ), PV+ cells (**D**,  $t(2) = 7.31$ ,  $P = 0.018$ ) and PNN+PV+ cells (**E**,  $t(2) = 7.39$ ,  $P = 0.018$ ), but did not alter the densities of PNN+PV- cells (**F**,  $t(2) = 3.58$ ,  $P = 0.07$ ) or PNN-PV+ cells (**G**,  $t(2) = 0.91$ ,  $P = 0.45$ ). Paired student-t-tests C-G.
